# Supplementary material for: Nutrient Intake among Pregnant Women in Spain and Poland: A Comparative Analysis
Source: MDPI journal article supplement (doi:10.3390/nu15143225), 2023-07-20
Supplement: s1 [file s1]

**Supplementary File S1.** Food frequency questionnaire used in ECLIPSES study.

|                                                                                                                                        |                                                                                   |                                                                                 |
|----------------------------------------------------------------------------------------------------------------------------------------|-----------------------------------------------------------------------------------|---------------------------------------------------------------------------------|
| Estudi <b>ECLIPSES</b><br>ID: <input type="text"/> <input type="text"/> <input type="text"/> <input type="text"/> <input type="text"/> |  | NOMBRE DE LA MADRE: _____<br>NOMBRE DEL NIÑO/A: _____<br>FECHA DE VISITA: _____ |
|----------------------------------------------------------------------------------------------------------------------------------------|-----------------------------------------------------------------------------------|---------------------------------------------------------------------------------|

**ESTUDI ECLIPSES-NEN: CUESTIONARIO DE ALIMENTACIÓN**

**HÁBITOS ALIMENTARIOS:**

**DE LA MADRE: INDIQUE CON UNA X LA RESPUESTA QUE USTED QUIERA SEÑALAR**

|                                                                     |                  |                                |                    |
|---------------------------------------------------------------------|------------------|--------------------------------|--------------------|
| 1. ¿Qué tipo de leche toma habitualmente?:                          | 1. Entera        | 2. Semidesnatada               | 3. Desnatada       |
| 2. ¿Qué tipo de yogur toma habitualmente?                           | 1. Entera        | 2. Desnatada                   | 3. Ambos           |
| 3. ¿Endulza con azúcar alimentos como leche, yogur,...?             | 1. No            | 2. Sí nº de cucharas _____     |                    |
| 4. ¿Qué tipo de pan toma habitualmente?                             | 1. Blanco        | 2. Integral                    | 3. Ambos           |
| 5. ¿Qué aceite utiliza habitualmente para aliñar?                   | 1. Oliva         | 2. Semilla (girasol, maíz,...) | 3. Indistintamente |
| 6. ¿Qué aceite utiliza habitualmente para cocinar?                  | 1. Oliva         | 2. Semilla (girasol, maíz,...) | 3. Indistintamente |
| 7. ¿Qué cantidad de aceite utiliza para cocinar?                    | 1. Abundante     | 2. Moderada                    | 3. Poca            |
| 8. En la mesa, ¿añade aceite a los platos (ejemplo: ensaladas,...)? | 1. Habitualmente | 2. Alguna vez                  | 3. Casi nunca      |
| 9. ¿Le añade aceite en el pan o en los bocadillos?                  | 1. Habitualmente | 2. Alguna vez                  | 3. Casi nunca      |
| 10. ¿Le añade mantequilla en el pan o en los bocadillos?            | 1. Habitualmente | 2. Alguna vez                  | 3. Casi nunca      |

**DEL NIÑO: INDIQUE CON UNA X LA RESPUESTA QUE USTED QUIERA SEÑALAR**

|                                                                     |                  |                                |                    |
|---------------------------------------------------------------------|------------------|--------------------------------|--------------------|
| 1. ¿Qué tipo de leche toma habitualmente?:                          | 1. Entera        | 2. Semidesnatada               | 3. Desnatada       |
| 2. ¿Qué tipo de yogur toma habitualmente?                           | 1. Entera        | 2. Desnatada                   | 3. Ambos           |
| 3. ¿Endulza con azúcar alimentos como leche, yogur,...?             | 1. No            | 2. Sí nº de cucharas _____     |                    |
| 4. ¿Qué tipo de pan toma habitualmente?                             | 1. Blanco        | 2. Integral                    | 3. Ambos           |
| 5. ¿Qué aceite utiliza habitualmente para aliñar?                   | 1. Oliva         | 2. Semilla (girasol, maíz,...) | 3. Indistintamente |
| 6. ¿Qué aceite utiliza habitualmente para cocinar?                  | 1. Oliva         | 2. Semilla (girasol, maíz,...) | 3. Indistintamente |
| 7. ¿Qué cantidad de aceite utiliza para cocinar?                    | 1. Abundante     | 2. Moderada                    | 3. Poca            |
| 8. En la mesa, ¿añade aceite a los platos (ejemplo: ensaladas,...)? | 1. Habitualmente | 2. Alguna vez                  | 3. Casi nunca      |
| 9. ¿Le añade aceite en el pan o en los bocadillos?                  | 1. Habitualmente | 2. Alguna vez                  | 3. Casi nunca      |
| 10. ¿Le añade mantequilla en el pan o en los bocadillos?            | 1. Habitualmente | 2. Alguna vez                  | 3. Casi nunca      |

|                                                                                                                                                                                                                                                                                                                                                                                                                                                             |                                                                                   |                                                                                 |
|-------------------------------------------------------------------------------------------------------------------------------------------------------------------------------------------------------------------------------------------------------------------------------------------------------------------------------------------------------------------------------------------------------------------------------------------------------------|-----------------------------------------------------------------------------------|---------------------------------------------------------------------------------|
| Estudi <b>ECLIPSES</b>                                                                                                                                                                                                                                                                                                                                                                                                                                      |  | NOMBRE DE LA MADRE: _____<br>NOMBRE DEL NIÑO/A: _____<br>FECHA DE VISITA: _____ |
| ID: <div style="display: inline-block; border: 1px solid black; width: 20px; height: 20px; margin: 0 5px;"></div> <div style="display: inline-block; border: 1px solid black; width: 20px; height: 20px; margin: 0 5px;"></div> <div style="display: inline-block; border: 1px solid black; width: 20px; height: 20px; margin: 0 5px;"></div> <div style="display: inline-block; border: 1px solid black; width: 20px; height: 20px; margin: 0 5px;"></div> |                                                                                   |                                                                                 |

### Cuestionario de Frecuencia de consumo Alimentario – CFCA:

Este cuestionario le pregunta la **frecuencia con la que la madre y su hijo/hija consume de forma habitual** determinados alimentos. La frecuencia de consumo se debe especificar en los recuadros de la derecha del listado alimentos de este cuestionario.

Para cada alimento del listado debe apuntar el **número de veces** que lo consume.

- Si lo consume todos los días de la semana (una vez al día), ponga un 7 en la columna A LA SEMANA.
- Si lo consume alguna vez a la semana, ponga las veces: 1-2-3-4-5 o 6 en la columna A LA SEMANA.

Piense siempre en sumar el consumo de todas las comidas del día (desayuno, comida, merienda, cena , otros ..).

Por ejemplo:

- Si toma todos los días leche para el desayuno y alguna vez a la semana para cenar:  $7 + 3 = 10$  veces a la semana
- Si toma carne 4 veces a la semana para comer y 2 para cenar:  $4 + 2 = 6$  veces a la semana

Únicamente marque una casilla por cada alimento (A LA SEMANA o AL MES)

- Si consume el alimento alguna vez al mes, ponga las veces: 1-2-3 etc...en la columna: AL MES
- Si no lo consume nunca o casi nunca, deje la casilla en blanco, sin poner nada.

Estudi ECLIPSES

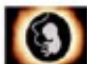

NOMBRE DE LA MADRE: \_\_\_\_\_

NOMBRE DEL NIÑO/A: \_\_\_\_\_

ID:      

FECHA DE VISITA: \_\_\_\_\_

### Cuestionario de Frecuencia de consumo Alimentario – CFCA DE LA MADRE

| ¿CUANTAS VECES COME?                                          | A LA SEMANA | AL MES |
|---------------------------------------------------------------|-------------|--------|
| Leche                                                         |             |        |
| Yogurt                                                        |             |        |
| Chocolate: tableta, bombones, Kit-Kat, Mars...                |             |        |
| Cereales inflados de desayuno ("Corn-Flakes" "Kellogg's")     |             |        |
| Galletas tipo "maría"                                         |             |        |
| Galletas con chocolate, crema...                              |             |        |
| Madalenas , bizcocho                                          |             |        |
| Ensamada, Donut, Croissant                                    |             |        |
|                                                               |             |        |
| Ensalada: Lechuga ,tomate, escarola....                       |             |        |
| Judías verdes, acelgas, espinacas                             |             |        |
| Verduras de guarnición: berenjena, calabacín, champiñón.      |             |        |
| Patatas al horno, fritas o hervidas                           |             |        |
| Legumbres: lentejas, garbanzos, alubias..                     |             |        |
| Arroz blanco, paella                                          |             |        |
| Pasta: fideos, macarrones, espaguetis...                      |             |        |
| Sopas y cremas                                                |             |        |
|                                                               |             |        |
| Huevos                                                        |             |        |
| Pollo o pavo                                                  |             |        |
| Ternera, cerdo, cordero (bistec, empanada)                    |             |        |
| Carne picada: longaniza, hamburguesa                          |             |        |
| Pescado blanco: merluza, mero..                               |             |        |
| Pescado azul: sardinas, atún, salmón....                      |             |        |
| Marisco: mejillones, gambas, langostinos, pulpo, calamares... |             |        |
| Croquetas, empanadillas, pizza                                |             |        |
| Pan (bocadillos, en comidas)                                  |             |        |
|                                                               |             |        |
| Jamón salado, dulce ,embutidos                                |             |        |
| Queso blanco o fresco (Burgos,...) o bajo en calorías         |             |        |
| Otros quesos curados o semicurados, cremosos                  |             |        |
|                                                               |             |        |
| Frutas cítricas: Naranja, mandarina                           |             |        |
| Otras frutas: Manzana, pera ,melocotón, albaricoque, plátano  |             |        |
| Frutas en conserva(en almíbar)                                |             |        |
| Zumos de fruta natural                                        |             |        |
| Zumos de fruta comercial                                      |             |        |
| Frutos secos: cacahuètes, avellanas, almendras                |             |        |
| Postres lácteos: natillas, flan, cuajada                      |             |        |
| Pasteles de crema y chocolate                                 |             |        |
| Bolsas de aperitivos ("chips", "chetos", "fritos" ...)        |             |        |
| Golosinas: caramelos, gominolas...                            |             |        |
| Helados : en verano/en invierno                               |             |        |
| Bebidas azucaradas ("coca-cola", "Fanta" ...)                 |             |        |
| Bebidas bajas en calorías (Coca-Cola light, cero...)          |             |        |
| Vino, sangría                                                 |             |        |
| Cerveza                                                       |             |        |
| Cerveza sin alcohol                                           |             |        |
| Bebidas destinadas (whisky, ginebra, coñac,...)               |             |        |

Estudi ECLIPSES

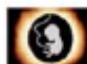ID:    

NOMBRE DE LA MADRE: \_\_\_\_\_

NOMBRE DEL NIÑO/A: \_\_\_\_\_

FECHA DE VISITA: \_\_\_\_\_

### Cuestionario de Frecuencia de consumo Alimentario – CFCA DEL NIÑO

| ¿CUANTAS VECES COME?                                          | A LA SEMANA | AL MES |
|---------------------------------------------------------------|-------------|--------|
| Leche                                                         |             |        |
| Yogurt                                                        |             |        |
| Chocolate: tableta, bombones, Kit-Kat, Mars...                |             |        |
| Cereales inflados de desayuno ("Corn-Flakes" "Kellogg's")     |             |        |
| Galletas tipo "maría"                                         |             |        |
| Galletas con chocolate, crema...                              |             |        |
| Madalenas , bizcocho                                          |             |        |
| Ensamada, Donut, Croissant                                    |             |        |
| Ensalada: Lechuga ,tomate, escarola....                       |             |        |
| Judías verdes, acelgas, espinacas                             |             |        |
| Verduras de guarnición: berenjena, calabacín, champiñón.      |             |        |
| Patatas al horno, fritas o hervidas                           |             |        |
| Legumbres: lentejas, garbanzos, alubias..                     |             |        |
| Arroz blanco, paella                                          |             |        |
| Pasta: fideos, macarrones, espaguetis...                      |             |        |
| Sopas y cremas                                                |             |        |
| Huevos                                                        |             |        |
| Pollo o pavo                                                  |             |        |
| Ternera, cerdo, cordero (bistec, empanada)                    |             |        |
| Carne picada: longaniza, hamburguesa                          |             |        |
| Pescado blanco: merluza, mero..                               |             |        |
| Pescado azul: sardinas, atún, salmón....                      |             |        |
| Marisco: mejillones, gambas, langostinos, pulpo, calamares... |             |        |
| Croquetas, empanadillas, pizza                                |             |        |
| Pan (bocadillos, en comidas)                                  |             |        |
| Jamón salado, dulce ,embutidos                                |             |        |
| Queso blanco o fresco (Burgos,...) o bajo en calorías         |             |        |
| Otros quesos curados o semicurados, cremosos                  |             |        |
| Frutas cítricas: Naranja, mandarina                           |             |        |
| Otras frutas: Manzana, pera ,melocotón, albaricoque, plátano  |             |        |
| Frutas en conserva(en almíbar)                                |             |        |
| Zumos de fruta natural                                        |             |        |
| Zumos de fruta comercial                                      |             |        |
| Frutos secos: cacahuètes, avellanas, almendras                |             |        |
| Postres lácteos: natillas, flan, cuajada                      |             |        |
| Pasteles de crema y chocolate                                 |             |        |
| Bolsas de aperitivos ("chips", "chetos", "fritos" ...)        |             |        |
| Golosinas: caramelos, gominolas...                            |             |        |
| Helados : en verano/en invierno                               |             |        |
| Bebidas azucaradas ("coca-cola", "Fanta" ...)                 |             |        |
| Bebidas bajas en calorías (Coca-Cola light, cero...)          |             |        |
